# Supplementary material
Source: PubMed Central journal article supplement (PMC4481320)
Supplement: NIHMS681169-supplement-Supplemental.pdf [file NIHMS681169-supplement-Supplemental.pdf]

## Supplementary Online Content

Kereiakes DJ, Yeh RW, Massaro JM, et al. Antiplatelet therapy duration following bare metal or drug-eluting coronary stents: the Dual Antiplatelet Therapy Study randomized clinical trial. *JAMA*. doi:10.1001/jama.2015.1671.

eTable 1. Study-specific inclusion and exclusion criteria

eTable 2. Baseline characteristics of all randomized patients

eTable 3. GUSTO and BARC Definitions

eFigure. Enrollment, randomization, and follow-up among randomized patients

eAppendix. DAPT Investigators by Country

This supplementary material has been provided by the authors to give readers additional information about their work.

**eTable 1. Study-specific inclusion and exclusion criteria**

|                                                                                                                                                                                                                                                                                                                                                                                                                                                                                                                                                                                                                                                                              |
|------------------------------------------------------------------------------------------------------------------------------------------------------------------------------------------------------------------------------------------------------------------------------------------------------------------------------------------------------------------------------------------------------------------------------------------------------------------------------------------------------------------------------------------------------------------------------------------------------------------------------------------------------------------------------|
| <b>2.1 Enrollment Inclusion Criteria</b>                                                                                                                                                                                                                                                                                                                                                                                                                                                                                                                                                                                                                                     |
| Patient must meet all of the following criteria to be eligible for treatment in the study:                                                                                                                                                                                                                                                                                                                                                                                                                                                                                                                                                                                   |
| 1. Patient is > 18 years of age.                                                                                                                                                                                                                                                                                                                                                                                                                                                                                                                                                                                                                                             |
| 2. Patients undergoing percutaneous intervention with stent deployment (or has w/in 3 calendar days).                                                                                                                                                                                                                                                                                                                                                                                                                                                                                                                                                                        |
| 3. Patients without known contraindication to dual antiplatelet therapy for at least 30 months after enrollment and stent implantation.                                                                                                                                                                                                                                                                                                                                                                                                                                                                                                                                      |
| 4. The patient has consented to participate and has authorized the collection and release of his medical information by signing the “Patient Informed Consent Form”. The informed consent will be valid for the duration of the trial or until the patient withdraws.                                                                                                                                                                                                                                                                                                                                                                                                        |
| <b>2.2 Enrollment Exclusion Criteria</b>                                                                                                                                                                                                                                                                                                                                                                                                                                                                                                                                                                                                                                     |
| Patients will be excluded from the study if any of the following criteria are met:                                                                                                                                                                                                                                                                                                                                                                                                                                                                                                                                                                                           |
| 1. Index procedure stent placement with stent diameter <2.25 mm or >4.0 mm.                                                                                                                                                                                                                                                                                                                                                                                                                                                                                                                                                                                                  |
| 2. Pregnant women.                                                                                                                                                                                                                                                                                                                                                                                                                                                                                                                                                                                                                                                           |
| 3. Planned surgery necessitating discontinuation of antiplatelet therapy (>14 days) within the 30 months following enrollment.                                                                                                                                                                                                                                                                                                                                                                                                                                                                                                                                               |
| 4. Current medical condition with a life expectancy of less than 3 years.                                                                                                                                                                                                                                                                                                                                                                                                                                                                                                                                                                                                    |
| 5. Concurrent enrollment in another device or drug study where the primary endpoint has not yet been reached or the device/drug might affect major endpoint outcomes in either open label or randomized phases of the DAPT study. The patient may only be enrolled in the DAPT Study once.                                                                                                                                                                                                                                                                                                                                                                                   |
| 6. Patients on long-term warfarin (or similar anticoagulant) therapy who are anticipated to still be on warfarin at the time of randomization.                                                                                                                                                                                                                                                                                                                                                                                                                                                                                                                               |
| 7. Patients with hypersensitivity or allergies to one of the drugs or components indicated in the Instructions for Use for the device implanted.                                                                                                                                                                                                                                                                                                                                                                                                                                                                                                                             |
| 8. Patients unable to give informed consent.                                                                                                                                                                                                                                                                                                                                                                                                                                                                                                                                                                                                                                 |
| 9. Patient treated with both DES and BMS during the index procedure.                                                                                                                                                                                                                                                                                                                                                                                                                                                                                                                                                                                                         |
| <b>2.3 Randomization Inclusion Criterion at 12 months</b>                                                                                                                                                                                                                                                                                                                                                                                                                                                                                                                                                                                                                    |
| Patient must meet the following criterion to be eligible for randomization in the study:                                                                                                                                                                                                                                                                                                                                                                                                                                                                                                                                                                                     |
| 1. Patient is “12 Month Clear”, defined as patients who are treated with 12 months of DAPT post index procedure and who are event free (from all death, myocardial infarction, stroke, repeat coronary revascularization, stent thrombosis, and major bleeding – “severe” or “moderate” by GUSTO classification) during that time. During the open label portion of this study (time 0-12m post-index procedure), a patient is considered compliant with the thienopyridine therapy for the purposes of eligibility if they take between 80% and 120% of the prescribed drug in the 0-6 month and 6-12 month periods without an interruption of therapy longer than 14 days. |

|                                                                                                                                   |
|-----------------------------------------------------------------------------------------------------------------------------------|
| <b>2.4 Randomization Exclusion Criteria at 12 months</b>                                                                          |
| Patients will be excluded from randomization if any of the following criteria are met:                                            |
| 1. Pregnant women.                                                                                                                |
| 2. Patient switched thienopyridine type or dose within 6 months prior to randomization.                                           |
| <b>NOTE: thienopyridine switching during the open label portion of this study is discouraged.</b>                                 |
| 3. Percutaneous coronary intervention or cardiac surgery between 6 weeks post index procedure and randomization.                  |
| 4. Planned surgery necessitating discontinuation of antiplatelet therapy (>14 days) within the 21 months following randomization. |
| 5. Current medical condition with a life expectancy of less than 3 years.                                                         |
| 6. Patients on warfarin or similar anticoagulant therapy.                                                                         |

**eTable 2. Baseline characteristics of all randomized patients**

| Characteristic                        | Drug-Eluting Stents<br>N=9961 | Bare Metal Stents<br>N=1687 | P Value | Continued Thienopyridine<br>N=5862 | Placebo<br>N=5786 | P Value |
|---------------------------------------|-------------------------------|-----------------------------|---------|------------------------------------|-------------------|---------|
| <b>Patients</b>                       |                               |                             |         |                                    |                   |         |
| Age (years); Mean±SD (N)              | 61.7±10.2 (9961)              | 59.0±10.8 (1687)            | <.001   | 61.4±10.3 (5862)                   | 61.2±10.3 (5786)  | 0.38    |
| Female                                | 25.4% (2526/9961)             | 23.7% (399/1687)            | 0.14    | 75.2% (4405/5862)                  | 74.6% (4318/5786) | 0.52    |
| Race-Non-White*                       | 8.8% (857/9765)               | 7.4% (123/1665)             | 0.07    | 8.7% (500/5748)                    | 8.5% (480/5682)   | 0.64    |
| Weight (kg); Mean±SD (N)              | 91.5±19.6 (9940)              | 88.3±18.6 (1686)            | <.001   | 91.0±19.6 (5850)                   | 91.1±19.4 (5776)  | 0.78    |
| BMI (Kg/m <sup>2</sup> ); Mean±SD (N) | 30.5±5.8 (9874)               | 29.5±5.4 (1677)             | <.001   | 30.4±5.7 (5810)                    | 30.4±5.8 (5741)   | 0.82    |
| Diabetes mellitus                     | 30.6% (3037/9933)             | 21.2% (354/1668)            | <.001   | 29.8% (1737/5839)                  | 28.7% (1654/5762) | 0.22    |
| Hypertension                          | 74.9% (7445/9940)             | 64.3% (1077/1674)           | <.001   | 74.1% (4330/5840)                  | 72.6% (4192/5774) | 0.06    |
| Cigarette smoker                      | 24.7% (2432/9858)             | 43.8% (710/1620)            | <.001   | 27.4% (1582/5777)                  | 27.4% (1560/5701) | 0.98    |
| Stroke/TIA                            | 3.3% (324/9937)               | 4.6% (77/1681)              | 0.01    | 3.4% (198/5845)                    | 3.5% (203/5773)   | 0.72    |
| Congestive heart failure              | 4.6% (461/9927)               | 3.7% (63/1681)              | 0.11    | 4.7% (273/5840)                    | 4.4% (251/5768)   | 0.42    |
| Peripheral arterial disease           | 5.8% (568/9794)               | 4.9% (81/1670)              | 0.14    | 5.5% (319/5768)                    | 5.8% (330/5696)   | 0.55    |
| Prior PCI                             | 30.7% (3047/9923)             | 19.1% (321/1680)            | <.001   | 28.6% (1668/5833)                  | 29.5% (1700/5770) | 0.31    |
| Prior CABG                            | 11.6% (1149/9942)             | 5.9% (100/1682)             | <.001   | 10.6% (618/5851)                   | 10.9% (631/5773)  | 0.53    |
| Prior MI                              | 21.6% (2118/9823)             | 20.4% (338/1653)            | 0.32    | 21.7% (1252/5777)                  | 21.1% (1204/5699) | 0.48    |
| Indication for Index PCI              |                               |                             |         |                                    |                   |         |
| ACS                                   | 26.0% (2588/9961)             | 58.6% (988/1687)            | <.001   | 30.8% (1805/5862)                  | 30.6% (1771/5786) | 0.84    |
| STEMI                                 | 10.5% (1045/9961)             | 37.6% (635/1687)            | <.001   | 14.4% (845/5862)                   | 14.4% (835/5786)  | 1.00    |
| NSTEMI                                | 15.5% (1543/9961)             | 20.9% (353/1687)            | <.001   | 16.4% (960/5862)                   | 16.2% (936/5786)  | 0.78    |
| Unstable Angina**                     | 16.7% (1663/9961)             | 9.4% (158/1687)             | <.001   | 15.6% (915/5862)                   | 15.7% (906/5786)  | 0.96    |
| Stable Angina                         | 37.7% (3752/9961)             | 23.5% (397/1687)            | <.001   | 35.5% (2081/5862)                  | 35.7% (2068/5786) | 0.79    |

|                                       |                      |                      |       |                   |                      |      |
|---------------------------------------|----------------------|----------------------|-------|-------------------|----------------------|------|
| Region                                |                      |                      | <.001 |                   |                      | 0.96 |
| North American                        | 89.5%<br>(8918/9961) | 60.9%<br>(1028/1687) |       | 85.5% (5011/5862) | 85.3%<br>(4935/5786) |      |
| Europe                                | 8.1%<br>(807/9961)   | 35.8%<br>(604/1687)  |       | 12.0% (706/5862)  | 12.2%<br>(705/5786)  |      |
| Australia or New Zealand              | 2.4%<br>(236/9961)   | 3.3%<br>(55/1687)    |       | 2.5% (145/5862)   | 2.5%<br>(146/5786)   |      |
| Any Risk Factor for Stent Thrombosis  | 50.9%<br>(4799/9436) | 69.0%<br>(1137/1647) | <.001 | 53.5% (2978/5572) | 53.7%<br>(2958/5511) | 0.82 |
| Any Clinical                          | 32.3%<br>(3016/9346) | 63.6%<br>(1046/1645) | <.001 | 37.2% (2056/5531) | 36.7%<br>(2006/5460) | 0.65 |
| Enzyme positive ACS (STEMI or NSTEMI) | 26.0%<br>(2588/9961) | 58.6%<br>(988/1687)  | <.001 | 30.8% (1805/5862) | 30.6%<br>(1771/5786) | 0.84 |
| Renal insufficiency/failure           | 4.2%<br>(420/9932)   | 2.9%<br>(48/1677)    | 0.01  | 4.3% (251/5839)   | 3.8%<br>(217/5770)   | 0.14 |
| LVEF < 30%                            | 1.6%<br>(146/9125)   | 3.8%<br>(61/1590)    | <.001 | 2.1% (111/5399)   | 1.8%<br>(96/5316)    | 0.36 |
| Any Lesion-Related                    | 31.3%<br>(3089/9873) | 38.1%<br>(641/1681)  | <.001 | 32.4% (1880/5812) | 32.2%<br>(1850/5742) | 0.89 |
| > 2 vessels stented                   | 0.5%<br>(48/9961)    | 0.1% (1/1687)        | 0.01  | 0.3% (19/5862)    | 0.5%<br>(30/5786)    | 0.12 |
| > 2 lesions per vessel                | 1.9%<br>(187/9959)   | 1.0%<br>(17/1687)    | 0.01  | 1.7% (102/5861)   | 1.8%<br>(102/5785)   | 0.94 |
| Lesion length ≥ 30 mm                 | 10.1%<br>(1004/9947) | 6.6%<br>(111/1687)   | <.001 | 9.5% (558/5854)   | 9.6%<br>(557/5780)   | 0.85 |
| Bifurcation sidebranch ≥ 2.5 mm       | 6.5%<br>(647/9946)   | 4.3%<br>(72/1687)    | <.001 | 6.2% (363/5852)   | 6.2%<br>(356/5781)   | 0.94 |
| In-stent restenosis of a DES          | 3.2%<br>(313/9916)   | 0.5% (9/1687)        | <.001 | 2.7% (159/5839)   | 2.8%<br>(163/5764)   | 0.74 |
| Vein bypass graft stented             | 2.8%<br>(280/9959)   | 2.5%<br>(42/1687)    | 0.52  | 2.5% (149/5861)   | 3.0%<br>(173/5785)   | 0.14 |
| Unprotected left main stented         | 0.4%<br>(42/9959)    | 0.1% (1/1687)        | 0.02  | 0.3% (19/5861)    | 0.4%<br>(24/5785)    | 0.45 |
| Thrombus-containing lesion            | 11.8%<br>(1070/9091) | 27.4%<br>(462/1687)  | <.001 | 14.5% (784/5416)  | 14.0%<br>(748/5362)  | 0.44 |
| Prior Brachytherapy                   | 0.3%<br>(26/9918)    | 0.1% (2/1679)        | 0.42  | 0.2% (14/5836)    | 0.2%<br>(14/5761)    | 1.00 |
| Thienopyridine at randomization       |                      |                      | <.001 |                   |                      | 0.97 |
| Clopidogrel                           | 65.3%<br>(6500/9961) | 86.7%<br>(1462/1687) |       | 68.4% (4008/5862) | 68.3%<br>(3954/5786) |      |
| Prasugrel                             | 34.8%<br>(3461/9961) | 13.3%<br>(225/1687)  |       | 31.6% (1854/5862) | 31.7%<br>(1832/5786) |      |

|                                        |                    |                   |       |                   |                   |      |
|----------------------------------------|--------------------|-------------------|-------|-------------------|-------------------|------|
| No. of treated lesions; Mean±SD (N)    | 1.3±0.6 (9961)     | 1.2±0.4 (1687)    | <.001 | 1.3±0.5 (5862)    | 1.3±0.5 (5786)    | 0.29 |
| No. of treated vessels; Mean±SD (N)    | 1.1±0.3 (9944)     | 1.0±0.2 (1687)    | <.001 | 1.1±0.3 (5854)    | 1.1±0.3 (5777)    | 0.34 |
| No. of stents; Mean±SD (N)             | 1.5±0.8 (9961)     | 1.3±0.6 (1687)    | <.001 | 1.5±0.7 (5862)    | 1.4±0.7 (5786)    | 0.25 |
| Minimum stent diameter                 |                    |                   | <.001 |                   |                   | 0.85 |
| < 3 mm                                 | 46.5% (4634/9961)  | 24.1% (407/1687)  |       | 43.4% (2542/5862) | 43.2% (2499/5786) |      |
| ≥ 3 mm                                 | 53.5% (5327/9961)  | 75.8% (1280/1687) |       | 56.6% (3320/5862) | 56.8% (3287/5786) |      |
| Total stent length – mm; Mean±SD (N)   | 27.6±16.9 (9961)   | 23.9±13.1 (1687)  | <.001 | 27.2±16.3 (5862)  | 26.9±16.6 (5786)  | 0.41 |
| <b>Lesion(s) ††</b>                    |                    |                   |       |                   |                   |      |
| Treated vessel                         |                    |                   |       |                   |                   |      |
| Left main                              | 0.9% (110/12993)   | 0.1% (1/1966)     | <.001 | 0.7% (55/7561)    | 0.8% (56/7398)    | 0.85 |
| Left anterior descending               | 40.8% (5301/12993) | 31.2% (614/1966)  | <.001 | 40.0% (3023/7561) | 39.1% (2892/7398) | 0.27 |
| Right coronary artery                  | 32.4% (4210/12993) | 45.2% (889/1966)  | <.001 | 34.3% (2590/7561) | 33.9% (2509/7398) | 0.67 |
| Circumflex                             | 22.9% (2979/12993) | 21.0% (413/1966)  | 0.06  | 22.2% (1679/7561) | 23.2% (1713/7398) | 0.17 |
| Venous graft                           | 2.5% (327/12993)   | 2.5% (49/1966)    | 1.00  | 2.4% (178/7561)   | 2.7% (198/7398)   | 0.21 |
| Arterial graft                         | 0.5% (66/12993)    | 0.0% (0/1966)     | <.001 | 0.5% (36/7561)    | 0.4% (30/7398)    | 0.54 |
| Modified ACC–AHA lesion class B2 or C‡ | 43.3% (5397/12472) | 47.7% (890/1866)  | <.001 | 44.0% (3194/7260) | 43.7% (3093/7078) | 0.72 |

Abbreviations: ACC, American College of Cardiology; ACS, acute coronary syndrome; AHA, American Heart Association; BMI, body mass index; CABG, coronary artery bypass graft; DES, drug-eluting stent; LAD, left anterior descending; LVEF, left ventricular ejection fraction; MI, myocardial infarction; NSTEMI, non-ST elevation MI; PCI, percutaneous coronary intervention; STEMI, ST-elevation MI; TIA, transient ischemic attack.

\*Race was self-reported.

\*\*This category included unstable angina without reported elevation of cardiac enzymes.

††A total of 13007 lesions were treated in DES-treated patients, 1966 in BMS-treated patients, 7569 in the continued thienopyridine group, and 7404 in the placebo group.

### eTable 3. GUSTO and BARC Definitions

#### GUSTO:

- Severe or life-threatening
  - Intracerebral hemorrhage
  - Resulting in substantial hemodynamic compromise requiring treatment
- Moderate
  - Requiring blood transfusion but not resulting in hemodynamic compromise

#### BARC:

- Type 2: any overt, actionable sign of hemorrhage (eg, more bleeding than would be expected for a clinical circumstance, including bleeding found by imaging alone) that does not fit the criteria for type 3, 4, or 5 but does meet at least one of the following criteria: (1) requiring nonsurgical, medical intervention by a healthcare professional, (2) leading to hospitalization or increased level of care, or (3) prompting evaluation
- Type 3
  - Type 3a
    - Overt bleeding plus hemoglobin drop of 3 to <5 g/dL\* (provided hemoglobin drop is related to bleed)
    - Any transfusion with overt bleeding
  - Type 3b
    - Overt bleeding plus hemoglobin drop  $\geq 5$  g/dL\* (provided hemoglobin drop is related to bleed)
    - Cardiac tamponade
    - Bleeding requiring surgical intervention for control (excluding dental/nasal/skin/hemorrhoid)
    - Bleeding requiring intravenous vasoactive agents
  - Type 3c
    - Intracranial hemorrhage (does not include microbleeds or hemorrhagic transformation, does include intraspinal)
    - Subcategories confirmed by autopsy or imaging or lumbar puncture
    - Intraocular bleed compromising vision
- Type 4: CABG-related bleeding
  - Perioperative intracranial bleeding within 48 h
  - Reoperation after closure of sternotomy for the purpose of controlling bleeding
  - Transfusion of  $\geq 5$  U whole blood or packed red blood cells within a 48-h period<sup>‡</sup>
  - Chest tube output  $\geq 2$ L within a 24-h period
- Type 5: fatal bleeding
  - Type 5a
    - Probable fatal bleeding; no autopsy or imaging confirmation but clinically suspicious
  - Type 5b
    - Definite fatal bleeding; overt bleeding or autopsy or imaging confirmation

eFigure. Enrollment, randomization, and follow-up among randomized patients

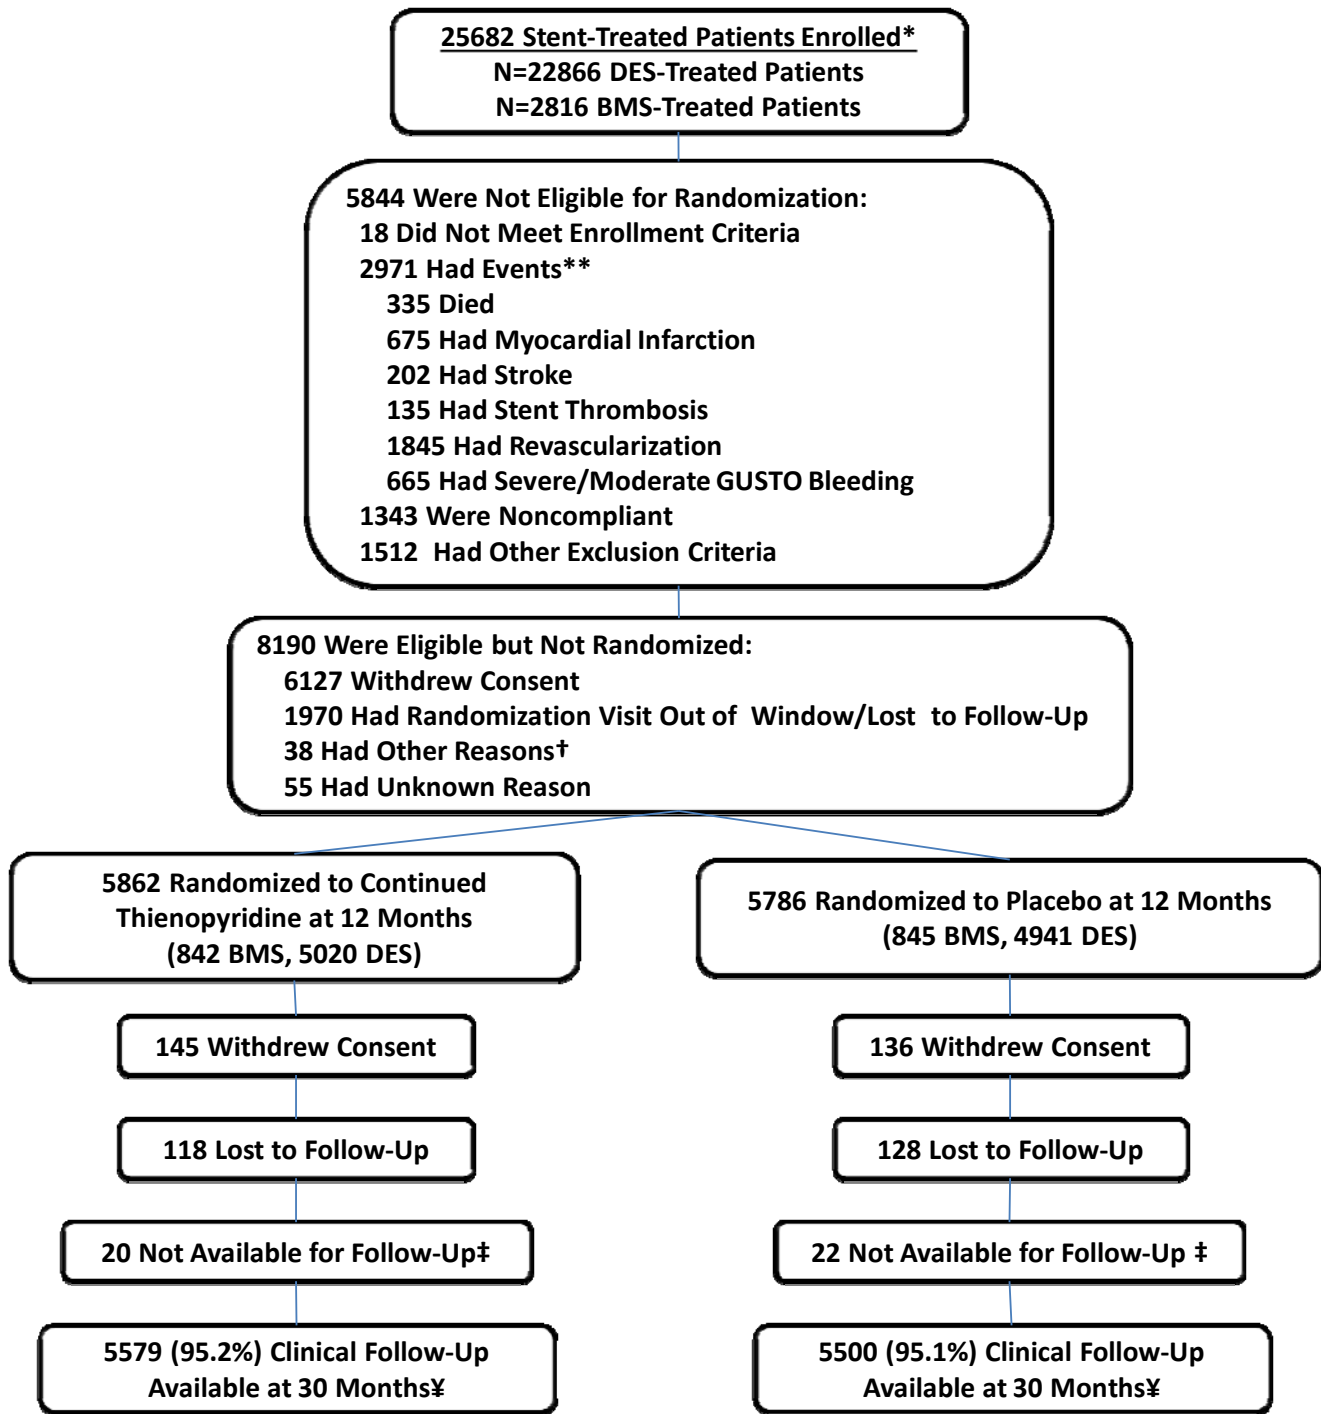

\*Screening for eligibility data are not available to report.

\*\*Subjects may have >1 event.

† Site terminated participation, randomization target met prior to subject follow-up, or subject not recognized to be eligible by site

‡Subjects move, were incarcerated, or were prematurely exited from the study.

¥ Although the number of patients with available data on clinical follow-up at 30 months is reported in each group, the efficacy end points were analyzed with the last available follow-up information in the intention-to-treat population, which included all patients who underwent randomization.



## **eAppendix. DAPT Investigators by Country**

Listed are investigators randomizing at least one DES patient.

### **ABBOTT XIENCE V USA STUDY**

#### *Co-Principal Investigators:*

James Hermiller, St. Vincent Medical Center, Indianapolis, Indiana, US

Mitch Krucoff, Duke Clinical Research Institute, Durham, North Carolina, US

#### **United States**

Aaron Kaplan, Dartmouth Hitchcock Medical Center, Lebanon, New Hampshire; Aaron J. Grantham, St. Luke's Hospital, MAHI (Mid America Heart Institute), Kansas City, Missouri; Abdulhay Albirini, Genesis HealthCare System, Good Samaritan Hospital, Zanesville, Ohio; Ahmed Abdel, Altru Health System, Grand Forks, North Dakota; Alice Jacobs, Boston Medical Center, Boston, Massachusetts; Ameer Kabour, Mercy St. Vincent's Medical Center, Toledo, Ohio; Arif Shakir, Midwest Regional Medical Center, Midwest City, Oklahoma; Arvind Agarwal, The Valley Hospital, Ridgewood, New Jersey; Ash Jain, California Cardiovascular Consultants Medical Associates, Washington Hospital, Fremont, California; Aylmer Tang, Chambersburg Hospital, Chambersburg, Pennsylvania; Barry Hackshaw, Desert Cardiology Center, Rancho Mirage, California; Brent McLaurin, AnMed Health, Anderson, South Carolina; Brent J. Muhlestein, J.L. Sorenson Heart & Lung, Intermountain Medical Center, Murray, Utah; Brian Dearing, Thomas Hospital, Fairhope, Alabama; Brian Negus, The Chattanooga Heart Institute, Chattanooga, Tennessee; Brian Jefferson, Centennial Heart, Sarah Cannon Research Institute, Nashville, Tennessee; Daniel Cassavar, The Toledo Hospital, Toledo, Ohio; Daniel Fisher, UMASS Memorial Medical Center, Worcester, Massachusetts; Daniel Lee, Bay Regional Medical Center, Bay City, Michigan; Daniel Donovan, Cardiology Clinic San Antonio, San Antonio, Texas; David Brill, Washington Adventist Hospital, Takoma Park, Maryland; David Lorenz, Cardiology Associates of Fairfield County, Stamford, Connecticut; David Eich, Sentara Norfolk General Hospital, Sentara Cardiovascular Research, Norfolk, Virginia; David Mego, Little Rock Cardiology Clinic, Arkansas Heart Hospital, Little Rock, Arkansas; David Rizik, Scottsdale Health Care, Scottsdale, Arizona; Dean Kereiakes, The Christ Hospital, Lindner Center, Cincinnati, Ohio; Dean E. Nukta, Cleveland Cardiology Research, Fairview Park, Ohio; Donald Westerhausen, Midwest Cardiovascular Research & Education Foundation, Elkhart, Indiana; Ernesto Rivera, Amarillo Heart Group, Amarillo, Texas; Gary Swank, Carilion Medical Center, Roanoke, Virginia; Gary Renaldo, Novant Clinical Research Institute, Forsyth Medical Center, Winston-Salem, North Carolina; Gene Chang, Penn Presbyterian Medical Center, Philadelphia, Pennsylvania; George Stouffer, University North Carolina Hospitals, Chapel Hill, North Carolina; George Chrysant, Integris Baptist Medical Center, Oklahoma City, Oklahoma; George Tadros, North Memorial Medical Center, Minneapolis, Minnesota; Gregory Elsner, The Care Group LLC, St. Vincent's Heart Center of Indiana, Indianapolis, Indiana; Gregory Mishkel, St. John's Hospital, Prairie Education and Research Cooperative, Springfield, Illinois; Gregory Boxberger, Galichia Heart Hospital, Wichita, Kansas; Gregory Giugliano, Baystate Medical Center, Springfield, Massachusetts; Hiroshi Yamasaki, St. John Hospital and Medical Center, Detroit, Michigan; Hoshedar Tamboli, Bay Area Cardiology Associates,

Brandon, Florida; Jack Jones, Cotton Oneil Cardiovascular Center, Topeka, Kansas; James Leggett, Over Lake Hospital Medical Center, Hope Heart Institute, Bellevue, Washington; James Choi, Baylor Heart & Vascular Hospital, Cardiology Consultants of Texas, Dallas, Texas; James Mills, Duke Raleigh Hospital, Raleigh, North Carolina; James Bengtson, Michigan Heart PC, Ypsilanti, Michigan; Jeffrey Lins, Tri-State Medical Group Cardiology, Beaver, Pennsylvania; Jeffrey Chambers, Metropolitan Cardiology Consultants, Minneapolis, Minnesota; Jeffrey Marshall, Northeast Georgia Medical Center, Gainesville, Georgia; Jerome Williams Jr., Mid Carolina Cardiology, Charlotte, North Carolina; Jerry Greenberg, Aurora Denver Cardiology Associates, Aurora, Colorado; John McPherson, Vanderbilt Medical Center, Nashville, Tennessee; John Wang, Union Memorial Hospital, MedStar Health, Baltimore, Maryland; John Rashid, HeartCare Midwest, St. Francis Hospital, Peoria, Illinois; John Miles McClure, Mid-Michigan Heart and Vascular Center, Saginaw, Michigan; Jorge Saucedo, University of Oklahoma Health Science Center, Oklahoma City, Oklahoma; Joseph Aragon, Santa Barbara Cottage Hospital, Santa Barbara, California; Kenneth Baran, St. Paul Heart Clinic, St. Paul, Minnesota; Kimberly Skelding, Geisinger Medical Center, Danville, Pennsylvania; Kiritkumar Patel, St. Joseph Mercy Oakland, Pontiac, Michigan; Louis Cannon, Cardiac and Vascular Research Center of North Michigan, Petoskey, Michigan; Lowell Satler, Washington Hospital Center, MedStar Health, Washington, District of Columbia; Luis Gruberg, Stony Brook University Medical Center, Stony Brook, New York; Mahesh Bikkina, St. Joseph's Regional Medical Center, Paterson, New Jersey; Manohar Angirekula, Permian Research Foundation, Odessa, Texas; Mark Studeny, University Cardiovascular Services, Huntington, West Virginia; Mark Goodwin, Midwest Heart Specialists, Edward Heart Hospital, Naperville, Illinois; Michael Ragosta, University of Virginia, Charlottesville, Virginia; Michael Martinelli, Albany Associates in Cardiology, Albany, New York; Michael Chang, Mercy General Hospital, Mercy Heart and Vascular Institute, Sacramento, California; Michael Rinaldi, Carolinas Medical Center, Sanger Heart Vascular Research, Charlotte, North Carolina; Michael Tamberella, Carolina Heart Specialists, Mid Carolina Cardiology Gastonia, Gastonia, North Carolina; Michael R. Wyman, Torrance Memorial Medical Center, Torrance, California; Mirle Kellett, Maine Medical Center, Portland, Maine; Mohammad Shoukfeh, Lubbock Heart Hospital Texas Cardiac Center, Lubbock, Texas; Naim Farhat, North Ohio Heart Center, North Ohio Research Ltd, Lorain, Ohio; Neerav Shah, Cardiology Partners Clinical Research, Wellington, Florida; Osvaldo Gigliotti, Seton Heart Institute, Austin, Texas; Patrick Cambier, Heart and Vascular Institute of Florida, Clearwater, Florida; Patrick Hall, Providence Hospital, South Carolina Heart Center, Columbia, South Carolina; Patrik Zetterlund, Salinas Valley Memorial Hospital, Salinas, California; Paul Gordon, The Miriam Hospital, Providence, Rhode Island; Paul Tolerico, York Hospital, York, Pennsylvania; Peter Kerwin, Midwest Heart Foundation, Elmhurst Memorial Hospital, Oakbrook Terrace, Illinois; Peter Ver Lee, Northeast Cardiology Associates, Eastern Maine Medical Center, Bangor, Maine; Raj Chandwaney, Hillcrest Medical Center, Tulsa, Oklahoma; Rajesh Dave, Spirit Physician Services, Capital Cardiovascular Associates, Camp Hill, Pennsylvania; Rajesh Sharma, Exempla Rocky Mountain Cardiology Associates, Denver, Colorado; Randel Smith, Hattiesburg Clinic P.A., Hattiesburg, Mississippi; Ray Matthews, University of Southern California, Los Angeles, California; Ricardo Yaryura, Sarasota Memorial Hospital, Sarasota, Florida; Richard Goldweit, Englewood Hospital and Medical Center, Englewood, New Jersey; Richard Padgett, Endovascular Research, Sacred Heart General Hospital, Springfield, Oregon; Robert Applegate, Wake Forest University, Winston-Salem, North Carolina; Robert Watson, Abington Medical Specialist, Abington, Pennsylvania; Robert

Merritt, St. John's Medical Research Institute, Springfield, Missouri; Ronald Caputo, St. Joseph Hospital Cardiology Associates, Liverpool, New York; Rupal Dumasia, Lancaster General Health, Lancaster, Pennsylvania; Saeed Shaikh, St. Francis Medical Group, Indiana Heart Physicians, Indianapolis, Indiana; Samin Sharma, Mount Sinai Medical Center, New York, New York; Samir Dabbous, Oakwood Hospital, Dearborn, Michigan; Sean Janzer, Paoli Hospital, Paoli, Pennsylvania; Sergio Waxman, Lahey Clinic Medical Center, Burlington, Massachusetts; Simon Dixon, William Beaumont Hospital, Royal Oak, Michigan; Spencer King, St. Joseph's Hospital Atlanta, St Joseph's Research Institute, Atlanta, Georgia; Steven Guidera, Doylestown Hospital, Doylestown, Pennsylvania; Steven Hearne, Delmarva Heart Research Foundation, Peninsula Regional Medical Center, Salisbury, Maryland; Tarek Helmy, University of Cincinnati, Cincinnati, Ohio; Theodore Lau, Franciscan Research Center, Tacoma, Washington; Thomas Martyak, Mary Washington Hospital, Fredericksburg, Virginia; Thomas Pow, Great Lakes Heart and Vascular Institute, St. Joseph, Michigan; Thomas Stuver, Rochester General Hospital, Rochester, New York; Thomasz Stys, Sanford Research, University of South Dakota, Sioux Falls, South Dakota; Vankeepuram Srinivas, Weiler Hospital, Montefiore Medical Center, Bronx, New York; William Bachinsky, PinnacleHealth, Moffitt Heart and Vascular Group, Wormleysburg, Pennsylvania; William Newman, Wake Heart Research Institute, Wake Heart and Vascular Associates, Raleigh, North Carolina; William Crowder, Jackson Heart Clinic, Jackson, Mississippi; Winaya Chepuri, Providence Regional Medical Center, Everett Colby Campus, Everett, Washington; Zafir Hawa, North Kansas City Hospital, North Kansas City, Missouri; Zaki Masud, Kaleida Health, Buffalo Heart Group, Buffalo, New York

## **BOSTON SCIENTIFIC LIBERTE POST-APPROVAL STUDY**

### *Co-Principal Investigators:*

David Lee, Stanford University Medical Center, Stanford, California, US  
Kirk Garratt, Lenox Hill Hospital, New York, New York, US

### **United States**

Abram Rabinowitz, South Texas Cardiovascular, San Antonio, Texas; Adhir Shroff, Jesse Brown VA Medical Center, Chicago, Illinois; Alan Moak, Penn Presbyterian Medical Center, Philadelphia, Pennsylvania; Ameer Kabour, Mercy St. Vincent's Medical Center, Toledo, Ohio; Andrew Rosenthal, Bayfront Medical Center, St. Petersburg, Florida; Andrew Taussig, Florida Hospital, Orlando, Florida; Anil Chhabra, Cardiovascular Research, LLC, Shreveport, Louisiana; Anthony Pucillo, Westchester Medical Center, Hawthorne, New York; Anthony White, NEA Baptist Clinic, Jonesboro, Arkansas; Barbara Barker, Arizona Regional Medical Center, Mesa, Arizona; Barry Bertolet, North Mississippi Medical Center, Tupelo, Mississippi; Brian Price, King's Daughters Medical Center, Ashland, Kentucky; Brijesh Bhambi, Bakersfield Heart, Bakersfield, California; Bruce Watt, North Central Heart Institute, Sioux Falls, South Dakota; C. David Hassel, Jacksonville Heart Center, Jacksonville, Florida; Charles Croft, Holmes Regional Medical Center, Melbourne, Florida; Charles Lambert, Pepin Heart Hospital, University Community Hospital, Tampa Florida; Christopher Caputo, North Florida Regional Medical Center, Gainesville, Florida; Clark McKenzie, St. John's Mercy Cardio Research, Mercy St. Louis, St. Louis, Missouri; David Dobies, Genesys Regional Medical Center, Grand Blanc, Michigan; David Lewis, South Central Wisconsin Heart, Meriter Hospital, Madison, Wisconsin; David Paniagua, Michael E. DeBakey VA Medical Center, Houston, Texas; David Lee,

Bakersfield Memorial Hospital, Stanford, California; Dinesh Shaw, Christus St. Frances Cabrini Hospital, Alexandria, Louisiana; Elie Korban, Jackson-Madison County General Hospital, Jackson, Tennessee; G. Ramon Aycock, Cardiology Consultants, Baptist Hospital, Pensacola, Florida; Geoffrey Kunz, New Mexico Heart Institute PA, Albuquerque, New Mexico; George Tadros, North Memorial Medical Center, Minneapolis, Minnesota; Greg Eaton, Medcentral Health System, Mid-Ohio Heart Clinic, Mansfield, Ohio; Gregory Simonian, Hackensack University Medical Center, Hackensack, New Jersey; James Phillips, Palmetto Richland Memorial Hospital, Columbia, South Carolina; James Hopkins, Christiana Hospital, Newark, Delaware; Jeffrey Carr, East Texas Medical Center, Tyler, Texas; Joel Cohn, Ingham Regional Medical Center, Lansing, Michigan; Joseph Kozina, Mercy General Hospital, Mercy Heart and Vascular Institute, Sacramento, California; Joseph Stella, Heart Care Research Foundation, Heart Care Centers of Illinois, Berwyn, Illinois; Joseph Tuma, Black Hills Cardiovascular Research, Rapid City Regional Hospital, Rapid City, South Dakota; Joshua Kieval, Palm Beach Heart Research Institute, JFK Medical Center, Atlantis, Florida; Kartik Giri, Cardiovascular Associates of Delaware Valley, Haddon Heights, New Jersey; Kenneth Baran, St. Paul Heart Clinic, St. Paul, Minnesota; Kirk Garratt, Lenox Hill Hospital, New York, New York; Louis Cannon, Cardiac and Vascular Research Center of North Michigan, Petoskey, Michigan; Marcel Zughaib, Providence Hospital, Southfield, Michigan; Mark Fisch, Clarian North Medical Center, Carmel, Indiana; Martha Stewart, Cardiology Consultants, Sacred Heart Hospital, Pensacola, Florida; Matthew Purvis, Medical Center of the Rockies, Loveland, Colorado; Maurice Buchbinder, Foundation for Cardiovascular Medicine, San Diego, California; Maurice Weiss, Jersey Shore University Medical Center, Neptune, New Jersey; Mazen Abu-Fadel, University of Oklahoma Health Science Center, Oklahoma City, Oklahoma; Michael Kelberman, St. Elizabeth Medical Center, Utica, New York; Michael Tamberella, Carolina Heart Specialists, Mid Carolina Cardiology Gastonia, Gastonia, North Carolina; Ofsman Quintana, Doctors Hospital at Renaissance, McAllen, Texas; Patrick Hall, Providence Hospital, South Carolina Heart Center, Columbia, South Carolina; Paul Ho, Kaiser Foundation Hospitals, Honolulu, Hawaii; Paul Mullen, Memorial Hospital at Gulfport, Gulfport, Mississippi; Peter Ver Lee, Northeast Cardiology Associates, Eastern Maine Medical Center, Bangor, Maine; R. Michael Wyman, Torrance Memorial Medical Center, Torrance, California; Rajesh Sharma, St. Anthony Central Hospital, Denver, Colorado; Randy Goodroe, Grand Strand Regional Medical Center, Myrtle Beach, South Carolina; Raymond Magorien, Ohio State University Medical Center, Columbus, Ohio; Ricky Ganim, Kingwood Medical Center, Humble, Texas; Robert Frankel, Maimonides Medical Center, Brooklyn, New York; Robert Jobe, Wake Heart Research Institute, Wake Heart and Vascular Associates, Raleigh, North Carolina; Robert Jumper, Cardiology Associates of Fairfield County, Stamford, Connecticut; Robert Stoler, Baylor Heart & Vascular Hospital, Cardiology Consultants of Texas, Dallas, Texas; Roger Hill, St. Bernard's Medical Center, Jonesboro, Arkansas; Ronald Jenkins, Kootenai Medical Center, Coeur d'Alene, Idaho; Sandeep Dube, Indiana Heart Hospital, Indianapolis, Indiana; Scott Davis, Baptist Health Medical Center, Little Rock, Arkansas; Scott Martin, Covenant Medical Center Inc., Covenant HealthCare, Saginaw, Michigan; Stephen McIntyre, Martin Memorial Health Systems, Martin Memorial Medical Center, Stuart, Florida; Steve Lin, St. Joseph Hospital, Lexington, Kentucky; Steven Rowe, Cox Medical Centers, Springfield, Missouri; Thomas McGarry, Oklahoma Foundation for Cardiovascular Research, Oklahoma City, Oklahoma; Thomas Pow, Great Lakes Heart and Vascular Institute, St. Joseph, Michigan; Tommy Lee, Stanford Medical Center, Stanford, California; William Felten, Mid Michigan Medical Center, Midland, Michigan; William

Nicholas, Freeman West Hospital, Joplin, Missouri; William Phillips, Central Maine Medical Center, Lewiston, Maine; Yazan Khatib, 1<sup>st</sup> Coast Cardiovascular Institute, Memorial Hospital Jacksonville, Jacksonville, Florida

## **CORDIS CYPRESS STUDY**

### *Co-Principal Investigators:*

Daniel Simon, University Hospitals Case Medical Center, Cleveland, Ohio, US  
David Kandzari, Piedmont Heart Institute, Atlanta, Georgia

### **United States**

Aaron Kaplan, Dartmouth Hitchcock Medical Center, Lebanon, New Hampshire; Abdel-Hamid Ahmed, Altru Health System, Grand Forks, North Dakota; Abdulhay Albirini, Genesis HealthCare System, Good Samaritan Hospital, Zanesville, Ohio; Amit Gupta, North Mississippi Medical Center, Tupelo, Mississippi; Andrew Rosenthal, Bayfront Medical Center, St. Petersburg, Florida; Angelo Ferraro, Sacred Heart Medical Center, Spokane, Washington; Anthony Spaedy, Missouri Heart Center, Columbia, Missouri; Antonis Pratsos, Bryn Mawr Hospital, Bryn Mawr, Pennsylvania; Ashit Jain, California Cardiovascular Consultants Medical Associates, Washington Hospital, Fremont, California; Aylmer Tang, Chambersburg Hospital, Chambersburg, Pennsylvania; Charles O'Shaughnessy, North Ohio Heart Center, North Ohio Research Ltd, Lorain, Ohio; Chin Kim, Florida Hospital, Orlando, Florida; Christopher Scott, University of Tennessee Medical Center, Knoxville, Tennessee; Claude Brachfeld, Promise Regional Medical Center, Hutchinson, Kansas; Daniel Fisher, UMASS Memorial Medical Center, Worcester, Massachusetts; David Churchill, Washington Regional Medical Center, Fayetteville, Arkansas; David Griffin, The Good Samaritan Hospital, Lebanon Cardiology Associates, Lebanon, Pennsylvania; David Roberts, Sacramento Heart and Vascular Institute, Sutter Memorial Hospital, Sacramento, California; David Henderson, Cardiology Research Associates, Daytona Beach, Florida; Dean Kereiakes, The Christ Hospital, Lindner Center, Cincinnati, Ohio; Dogan Temizer, Good Samaritan Hospital, Cincinnati, Ohio; Dustin Letts, Carolina Heart Specialists, Mid Carolina Cardiology Gastonia, Gastonia, North Carolina; Ernesto Rivera, Amarillo Heart Group, Amarillo, Texas; Fayaz Shawl, Washington Adventist Hospital, Takoma Park, Maryland; Fayez Shamon, St. Michael's Medical Center, Newark, New Jersey; Francis Kiernan, Hartford Hospital, Hartford, Connecticut; George Pilcher, St. Vincent's Healthcare, Jacksonville, Florida; Gregory Mishkel, St. John's Hospital, Prairie Education and Research Cooperative, Springfield, Illinois; Gregory Eaton, Medcentral Health System, Mid-Ohio Heart Clinic, Mansfield, Ohio; Guy Piegari, Berks Cardiologists Ltd, Wyomissing, Pennsylvania; Henry Chen, The Heart Center PC, Huntsville, Alabama; Herbert Aronow, Michigan Heart & Vascular Institute, Ypsilanti, Michigan; James Leggett, Over Lake Hospital Medical Center, Hope Heart Institute, Bellevue, Washington; James Wilson, Texas Heart Institute, Houston, Texas; Janah Aji, Cooper University Hospital, Camden, New Jersey; Janet Strain, The Valley Hospital, Ridgewood, New Jersey; Jeffrey Moses, Columbia Presbyterian Hospital, New York, New York; Jerome Williams, Mid Carolina Cardiology, Charlotte, North Carolina; Jerry Greenberg, Aurora Denver Cardiology Associates, Aurora, Colorado; John Griffin, Cardiovascular Associates Ltd, Virginia Beach, Virginia; John Hawkins, St. John's Medical Research Institute, Springfield, Missouri; John Katopodis, Tallahassee Research Institute, Tallahassee, Florida; John Marshall, Northeast Georgia Medical Center, Gainesville,

Georgia; John Wang, Union Memorial Hospital, MedStar Health, Baltimore, Maryland; Jonathan Waltman, St. Joseph Hospital, Lexington, Kentucky; Joseph Galichia, Galichia Heart Hospital, Wichita, Kansas; Kenneth Khaw, Our Lady of Lourdes Medical Center, Voorhes, New Jersey; Kenneth Khaw, AtlantiCare Regional Medical Center, Pomona, New Jersey; Kevin Croce, Brigham and Women's Hospital, Boston, Massachusetts; Lang Lin, Morton Plant Hospital, Clearwater Cardiovascular, Safety Harbor, Florida; Lee MacDonald, Swedish Medical Center, Englewood, Colorado; Lowell Satler, Washington Hospital Center, MedStar Health, Washington, District of Columbia; Luis Tami, Memorial Regional Hospital, Research Physicians Network, Hollywood, Florida; Mahesh Bikkina, St. Joseph's Regional Medical Center, Paterson, New Jersey; Marc Unterman, St. Joseph's Hospital Atlanta, St Joseph's Research Institute, Atlanta, Georgia; Marcel Lechin, College Station Medical Center, BCS Heart LLP, College Station, Texas; Mark Rothenberg, Palm Beach Heart Research Institute, JFK Medical Center, Atlantis, Florida; Mark Grabarczyk, Greenville Memorial Hospital, Upstate Cardiology PA, Greenville, South Carolina; Mark Greenberg, Moses Hospital, Montefiore Medical Center, Bronx, New York; Massoud Leesar, University of Cincinnati, Cincinnati, Ohio; Matthew Hook, Wake Heart Research Institute, Wake Heart and Vascular Associates, Raleigh, North Carolina; Maurice Buchbinder, Foundation for Cardiovascular Medicine, San Diego, California; Mayra Guerrero, Henry Ford Hospital, Detroit, Michigan; Michael Ball, The Care Group LLC, St. Vincent's Heart Center of Indiana, Indianapolis, Indiana; Michael Cunningham, University Hospitals Case Medical Center, Cleveland, Ohio; Michael Savage, Thomas Jefferson University Hospital, Philadelphia, Pennsylvania; Michael Chang, Mercy General Hospital, Mercy Heart and Vascular Institute, Sacramento, California; Michael Jones, Central Baptist Hospital, Lexington, Kentucky; Michael Rinaldi, Carolinas Medical Center, Sanger Heart Vascular Research, Charlotte, North Carolina; Nima Amjadi, Texas Heart and Vascular, Austin, Texas; Norberto Schechtmann, MIMA Century Research Associates, Health First, Melbourne, Florida; Patrick Hall, Providence Hospital, South Carolina Heart Center, Columbia, South Carolina; Patrick Flaherty, Little Rock Cardiology Clinic, Arkansas Heart Hospital, Little Rock, Arkansas; Paul Gordon, The Miriam Hospital, Providence, Rhode Island; Paul Mahoney, Sentara Norfolk General Hospital, Sentara Cardiovascular Research, Norfolk, Virginia; Periakaruppan Ramanathan, Northwest Ohio Cardiology Consultants, Toledo Hospital, Toledo, Ohio; Riyaz Bashir, Temple University, Philadelphia, Pennsylvania; Robert Hibbard, Bryan LGH Medical Center, Lincoln, Nebraska; Robert Maholic, Hamot Medical Center, Erie, Pennsylvania; Robert Siegel, Arizona Regional Medical Center, Mesa, Arizona; Rohit Sundrani, Cardiovascular Consultants, Fresno Heart Hospital, Fresno, California; Samir Germanwala, Longview Regional Medical Center, Diagnostic Clinic of Longview, Longview, Texas; Samir Hadeed, Conemaugh Valley Memorial Hospital, Johnstown, Pennsylvania; Stephen Cook, Endovascular Research, Sacred Heart General Hospital, Springfield, Oregon; Steven Yakubov, Ohio Health Research Institute, Riverside Methodist Hospital, Columbus, Ohio; Steven Guidera, Doylestown Hospital, Doylestown, Pennsylvania; Stylianos Papadakos, Lenox Hill Hospital, New York, New York; Tanvir Bajwa, Aurora St. Luke's, Sinai Medical Center, Milwaukee, Wisconsin; Thomas Mathew, Slocum Dickson Medical Group, New Hartford, New York; Vafa Mansouri, St. Thomas Hospital, Nashville, Tennessee; Vankeepuram Srinivas, Weiler Hospital, Montefiore Medical Center, Bronx, New York; Vishal Gupta, Borgess Research Institute, Kalamazoo, Michigan; William Colyer, University of Toledo Medical Center, Toledo, Ohio; William Kuehl, Asheville Cardiology Associates, Asheville, North Carolina; William Nicholson, York Hospital, York, Pennsylvania; William Dillon, Louisville Cardiology Medical, Louisville,

Kentucky; Youssef Al-Saghir, 1<sup>st</sup> Coast Cardiovascular Institute, Memorial Hospital Jacksonville, Jacksonville, Florida; Zaki Masud, Kaleida Health, Buffalo Heart Group, Buffalo, New York

## **MEDTRONIC EDUCATE STUDY**

### *Co-Primary Investigators:*

Donald Cutlip, Beth Israel Deaconess Medical Center, Boston, MA, US  
Dr. Harold Dauerman, Fletcher Allen Hospital, Burlington, VT, US

### **Canada**

Ata Quraishi, QEII Health Sciences Centre, Halifax, Nova Scotia, Labinaz Marino, University of Ottawa Heart Institute, Ottawa, Ontario

### **United States**

Abdullah Albirini, Genesis HealthCare System, Good Samaritan Hospital, Zanesville, Ohio; Ahmad Aslam, Tomball Regional Medical Center, Tomball, Texas; Ahmad Zankar, VA North Texas Health Care Center, Dallas VA Medical Center, Dallas, Texas; Alpesh Shah, The Methodist Hospital, Houston, Texas; Anthony Spaedy, Missouri Heart Center, Columbia, Missouri; Arthur Loussarian, Mission Hospital, Mission Viejo, California; Ash Jain, California Cardiovascular Consultants Medical Associates, Washington Hospital, Fremont, California; Aylmer Tang, Chambersburg Hospital, Chambersburg, Pennsylvania; Barry Sharaf, Rhode Island Hospital, Providence, Rhode Island; Bernardo Stein, Morton Plant Hospital, Clearwater Cardiovascular, Safety Harbor, Florida; Brent McLaurin, AnMed Health, Anderson, South Carolina; Charles Croft, Holmes Regional Medical Center, Melbourne, Florida; Christopher Kim, Utah Cardiology, Layton, Utah; Clinton Malone, Colorado Cardiac Alliance, Colorado Springs, Colorado; Colin Barker, Memorial Hermann Hospital, Houston, Texas; Daniel Fisher, UMASS Memorial Medical Center, Worcester, Massachusetts; Daniel Steinberg, Medical University of South Carolina Hospital, Gazes Cardiac Research Institute, Charleston, South Carolina; Darrel Gumm, HeartCare Midwest, St. Francis Hospital, Peoria, Illinois; Donald Canaday, Inland Cardiology Associates, Spokane, Washington; Donald Cutlip, Beth Israel Deaconess Medical Center, Boston, Massachusetts; Ezra Deutsch, Southside Hospital, Bay Shore, New York; Fadi Matar, Tampa General Hospital, Tampa, Florida; Fred St. Goar, El Camino Hospital, Mountain View, California; Garpreet Baweja, Texas Health Research & Education, Fort Worth, Texas; George Myers, Redmond Regional Medical Center, Sarah Cannon Research Institute, Rome, Georgia; George Vetrovec, Virginia Commonwealth University Medical Center, Richmond, Virginia; Harold Dauerman, Fletcher Allen Health Care, Burlington, Vermont; Jaikirshan Khatri, Southwest General Health Center, Middleburg Heights, Ohio; James Bengtson, St. Joseph Mercy Hospital, Ann Arbor, Michigan; James Fix, Bloomington Hospital, Bloomington, Indiana; Janet Strain, Valley Hospital, Ridgewood, New Jersey; Jay K. Patel, Hamilton Cardiology Associates, Hamilton, New Jersey; Jeffrey Chambers, Mercy Hospital, Coon Rapids, Minnesota; John Altman, Rocky Mountain Cardiovascular Associates, Denver, Colorado; John Collins, St. Mary's of Michigan, Saginaw, Michigan; John Manley, Wisconsin Heart Hospital, Wauwatosa, Wisconsin; John Messenger, University of Colorado Hospital, Aurora, Colorado; John Riddick, Centennial Heart, Sarah Cannon Research Institute, Nashville, Tennessee; Joseph Stella, Heart Care Research Foundation, Heart Care

Centers of Illinois, Berwyn, Illinois; Juan Pastor-Cervantes, Memorial Regional Hospital, Research Physicians Network, Hollywood, Florida; Kevin Boran, Cardiovascular Consultants, Fresno Heart Hospital, Fresno, California; Kimberly Skelding, Geisinger Medical Center, Danville, Pennsylvania; Lakhjit Sandhu, St. Agnes Medical Center, Fresno, California; Lee Jobe, Wake Heart Research Institute, Wake Heart and Vascular Associates, Raleigh, North Carolina; Leslie G. Walters, Augusta Cardiology Clinic, Augusta, Georgia; Maciej Malinski, Sherman Hospital, Elgin, Illinois; Magdi Ghali, Iowa Heart Center, Mercy Medical Center, Des Moines, Iowa; Manish Chauhan, Cardiovascular Specialists of Texas, North Austin Medical Center, Austin, Texas; Mark Izzo, St. Vincent Consultants in Cardiovascular Diseases, Erie, Pennsylvania; Mark Neustel, St. Mary's of Duluth, Duluth, Minnesota; Mark Dorogy, Medical Center of Central Georgia, Macon, Georgia; Martin Fejka, Exempla Lutheran Medical Center, Exempla Rocky Mountain Cardiovascular Associates, Wheat Ridge, Colorado; Michael Ball, The Care Group LLC, St. Vincent's Heart Center of Indiana, Indianapolis, Indiana; Michael Hagley, Promise Regional Medical Center, Hutchinson, Kansas; Neerav Shah, Cardiology Partners Clinical Research, Wellington, Florida; Nima Amjadi, Texas Heart and Vascular, Austin, Texas; Patrick Cambier, Heart and Vascular Institute of Florida, Clearwater, Florida; Patrick Hall, Providence Hospital, South Carolina Heart Center, Columbia, South Carolina; Patrick Flaherty, Little Rock Cardiology Clinic, Arkansas Heart Hospital, Little Rock, Arkansas; Paul Gordon, The Miriam Hospital, Providence, Rhode Island; Paul Overlie, Lubbock Heart Hospital, Texas Cardiac Center, Lubbock, Texas; Rajul Patel, Phoenix Heart PLLC, Glendale, Arizona; Richard Kovach, Deborah Heart & Lung Center, Browns Mills, New Jersey; Robert Stoler, Baylor Heart & Vascular Hospital, Cardiology Consultants of Texas, Dallas, Texas; Ronald Caputo, St. Joseph Hospital Cardiology Associates, Liverpool, New York; Sridhar Kumar, Mercy Hospital Scranton, Scranton, Pennsylvania; Steven Hearne, Delmarva Heart Research Foundation, Peninsula Regional Medical Center, Salisbury, Maryland; Stylianos Papadakos, Lenox Hill Hospital, New York, New York; Talal Baki, Piedmont Heart Institute, Piedmont Medical Center, Atlanta, Georgia; Thaddeus Tolleson, Tyler Cardiovascular Consultants, Tyler, Texas; Thomas Haldis, MeritCare Hospital Pharmacy, Sanford Medical Center, Fargo, North Dakota; Thomas LaLonde, St. John Hospital and Medical Center, Detroit, Michigan; Tim Trageser, Hamot Medical Center, Erie, Pennsylvania; Timothy Gardner, Bryan LGH Medical Center, Lincoln, Nebraska; Timothy Shapiro, Lankenau Hospital, Main Line Health Heart Center, Wynnewood, Pennsylvania; Viral Mehta, Comprehensive Cardiovascular, Bakersfield, California; Wayne Leimbach, Hillcrest Medical Center, Tulsa, Oklahoma; William Matthai, Penn Presbyterian Medical Center, Philadelphia, Pennsylvania; William R. Schmidt II, Norton Audubon, Louisville, Kentucky; Ziad Abbud, Jersey Shore University Medical Center, Neptune, New Jersey

## **HCRI DAPT**

### *Co-Principal Investigators:*

Laura Mauri (Brigham and Women's Hospital, Boston, MA, US)

Dean J. Kereiakes (The Christ Hospital Heart and Vascular Center, The Lindner Research Center, Cincinnati, OH, US)

## **Australia**



David Muller, St. Vincent's Hospital Sydney, Darlinghurst; Ian Meredith, Monash Heart Southern Health, Clayton; Jamie Rankin, Royal Perth Hospital, Perth; Matthew Worthley, Royal Adelaide Hospital, Adelaide; Nigel Jepson, Prince of Wales Eastern Heart, Randwick; Peter Thompson, Sir Charles Gardiner Hospital, Nedlands; Peter Thompson, The Mount Hospital, Nedlands; Randall Hendriks, Fremantle Hospital, Fremantle; Robert Whitbourn, St. Vincent's Hospital Melbourne, Fitzroy; Steven Duffy, The Alfred Hospital, Melbourne

### **Czech Republic**

Zdenek Coufal, KNTB a.s., Zlin; Kamil Novobilsky, Mestská nemocnice Ostrava, Ostrava; Robert Naplava, Centrum pro choroby srdce, Kromeriz; Josef Stasek, FN Hradec Kralove, Hradec Kralove

### **France**

Erwan Bressollette, Nouvelle Cliniques Nantaises, Nantes cedex 2; Bruno Vaquette, Hopital Saint Louis, La Rochelle; Emmanuel Teiger, CHU Henri Mondor, Créteil; Gabriel Steg, Hospital Bichat, Paris; Riadh Rihani, Hôpital Saint Philibert, Lomme

### **Germany**

Harald Darius, Vivantes-Klinikum Neukoelln, Berlin; Martin W. Bergmann, Asklepios Klinik St. Georg, Hamburg; Peter Radke, UK-SH, Luebeck; Philipp Sebastian, Elbe-Kliniken Stade GmbH, Stade; Ruth Strasser, Universitaetsklinikum Dresden, Dresden; Stefan Hoffmann, Vivantes Klin. Friedrichshain, Berlin; Steffen Behrens, Vivantes-Humboldt Klinikum, Berlin; Sven Moebius-Winkler, Herzzentrum Leipzig GmbH, Leipzig

### **Hungary**

Tamas Forster, Szegedi Tudomanyegyetem SZ-GY, Szeged; Ivan Horvath, Pecs Tudomanyegyetem Klinikai Kozpont, Pecs; Sandor Kancz, Gottsegen Gyorgy Orszagos Kardiologiai Intezet, Budapest; Zsolt Koszegi, Josa Andras Oktato Korhaz Nonprofit Kft, Nyiregyhaza

### **New Zealand**

Gerry Devlin, Waikato Hospital, Hamilton; Hamish Hart, North Shore Hospital, Auckland; John Elliott, Christchurch Hospital, Christchurch; John Ormiston, Mercy Angiography, Auckland; Malcolm Abernathy, Wakefield Hospital, Wellington; Nick Fisher, Nelson Hospital, Nelson; Patrick Kay, Middlemore Hospital, Auckland; Scott Harding, Wellington Hospital, Wellington; Warwick Jaffe, Ascot Integrated Hospital, Auckland

### **Poland**

Andrzej Hoffmann, Wielospecj. Szpital Miejski im, Bydgoszcz; Pawel Buszman, Polsko-Amerykanske Kliniki Serca, Ustron; Cezary Sosnowski, Instytut Kardiologii Kardynala Wyszynskiego, Warszawa; Slawomir Dobrzycki, Uniwer. Szpital Klin. Bialystok, Bialystok;

Jaroslaw Trebacz, NZOZ Centr. Med. Beluga-Med, Krakow; Zdzislawa Kornacewicz-Jach, SPSK nr 2 Pomor. AM Szczecin, Szczecin

## **Romania**

Adrian Corneliu Iancu, Institutul Inimii Niculae Stancioiu Cluj-Napoca, Cluj-Napoca

## **United Kingdom**

Dawn Adamson, Coventry and Warwickshire UH, Coventry; Piers Clifford, Wycombe General Hospital, High Wycombe; Dirk Felmeden, Torbay Hospital, Torquay; Anthony Gershlick, Glenfield Hospital, Leicester; Ajay Jain, London Chest Hospital, London; John Irving, Ninewells Hospital & MS, Dundee; John Edmond, Weston General Hospital, Weston Super Mare, Somerset; Mark de Belder, James Cook Hospital, Middlesbrough; Michael Pitt, Heartland Hospital, Birmingham; Peter O’Kane, Bournemouth Hospital, Castle Lane East, Bournemouth; Paul Kelly, Basildon University Hospital, Basildon; Ian Purcell, Freeman Hospital, Newcastle upon Tyne; Venkatesan Suresh, Derriford Hospital, Plymouth

## **United States**

Abdel Ahmed Altru Health System, Grand Forks, North Dakota; Abdulhay Albirini, Genesis HealthCare System, Good Samaritan Hospital, Zanesville, Ohio; Abel Moreyra, University of Medicine and Dentistry of New Jersey, Robert Wood Johnson Medical School, New Brunswick, New Jersey; Abram Rabinowitz, South Texas Cardiovascular, San Antonio, Texas; Adhir Shroff, Jesse Brown VA Medical Center, Chicago, Illinois; Alice Jacobs, Boston Medical Center, Boston, Massachusetts; Anand Irimpen, Tulane Medical Center, New Orleans, Louisiana; Andrew Taussig, Florida Hospital, Orlando, Florida; Anthony White, NEA Baptist Clinic, Jonesboro, Arkansas; Arif Shakir, Midwest Regional Medical Center, Midwest City, Oklahoma; Arnold Ghitis, Diagnostic Cardiology Associates, Fort Lauderdale, Florida; Arvind Agarwal, The Valley Hospital, Ridgewood, New Jersey; Ash Jain, California Cardiovascular Consultants Medical Associates, Washington Hospital, Fremont, California; Atul Chawla, Iowa Heart Center, Mercy Medical Center, Des Moines, Iowa; Aylmer Tang, Chambersburg Hospital, Chambersburg, Pennsylvania; Barry Bertolet, Cardiology Associates Research LLC, Tupelo, Mississippi; Barry Uretsky, Arkansas VA Medical Center, Little Rock, Arkansas; Bernard Erickson, Central Minnesota Heart Center at St. Cloud Hospital, St. Cloud, Minnesota; Bhola Rama, Frederick C Smith Clinic, Marion, Ohio; Brent McLaurin, AnMed Health, Anderson, South Carolina; Brian Dearing, Thomas Hospital, Fairhope, Alabama; Brian Negus, The Chattanooga Heart Institute, Chattanooga, Tennessee; Bruce Bowers, Cardiopulmonary Research Science and Technology Institute, Dallas, Texas; Bruce Watt, North Central Heart Institute, Sioux Falls, South Dakota; Charles Lambert, Pepin Heart Hospital, University Community Hospital, Tampa, Florida; Charles Shoultz, Providence Health Center, Waco, Texas; Christopher Wolfe, Providence St. Peter Hospital, Olympia, Washington; Craig Thieling, Hattiesburg Clinic P.A., Hattiesburg, Mississippi; Daniel Fisher, UMASS Memorial Medical Center, Worcester, Massachusetts; Daniel Lee, Bay Regional Medical Center, Bay City, Michigan; David Eich, Sentara Norfolk General Hospital, Sentara Cardiovascular Research, Norfolk, Virginia; David Goldberg, New England Heart Institute, Catholic Medical Center, Manchester, New Hampshire; David Mego, Little Rock Cardiology Clinic, Arkansas Heart Hospital, Little Rock, Arkansas;

David Rizik, Scottsdale Health Care, Scottsdale, Arizona; David Safley, St. Luke's Hospital, Mid America Heart Institute, Kansas City, Missouri; Dawn Abbott, Rhode Island Hospital, Providence, Rhode Island; Dean Kereiakes, The Christ Hospital, Lindner Center, Cincinnati, Ohio; Donald Canaday, Inland Cardiology Associates, Spokane, Washington; Donald Cutlip, Beth Israel Deaconess Medical Center, Boston, Massachusetts; Donald Myears, St. John's Medical Research Institute, Springfield, Missouri; Donald Westerhausen, Midwest Cardiovascular Research & Education Foundation, Elkhart, Indiana; Douglas Ebersole, Watson Clinic Center for Research, Lakeland, Florida; Douglas Netz, Nebraska Heart Institute, Lincoln, Nebraska; Edward Kosinski, Connecticut Clinical Research LLC, Bridgeport, Connecticut; Ehtisham Mahmud, UCSD Medical Center, San Diego, California; Eric Hockstad, Kansas City Heart Foundation, Kansas City, Missouri; Fayaz Shawl, Washington Adventist Hospital, Takoma Park, Maryland; Fayez Shamoon, St. Michael's Medical Center, Newark, New Jersey; Gary Schaer, Rush University Medical Center, Chicago, Illinois; George Kichura, St. John's Mercy Cardiovascular Research, Mercy St. Louis, St. Louis, Missouri; George Myers, Redmond Regional Medical Center, Sarah Cannon Research Institute, Rome, Georgia; Georges I. Kaddissi, Our Lady of Lourdes Medical Center, Camden, New Jersey; Govind Ramadurai, Heartland Cardiovascular Center, Joliet, Illinois; Gregory Elsner, The Care Group LLC, St. Vincent's Heart Center of Indiana, Indianapolis, Indiana; Guy Piegari, Berks Cardiologists Ltd, Wyomissing, Pennsylvania; Henry Liberman, Emory University Hospital Midtown, Atlanta, Georgia; Hoshedar P. Tamboli, Bay Area Cardiology Associates, Brandon, Florida; Imran Dotani, McFarland Clinic PC, Ames, Iowa; James Tift Mann, Wake Heart Research Institute, Wake Heart and Vascular Associates, Raleigh, North Carolina; James Revenaugh, J.L. Sorenson Heart & Lung, Intermountain Medical Center, Murray, Utah; James F. Fleischhauer, Cardiology Consultants, Sacred Heart Hospital, Pensacola, Florida; Jan Pattanayak, Asheville Cardiology Associates, Asheville, North Carolina; Janah Aji, Cooper University Hospital, Camden, New Jersey; Jay Patel, Hamilton Cardiology Associates, Hamilton, New Jersey; John Douglas, Emory University Hospital, Atlanta, Georgia; John Griffin, Cardiovascular Associates Ltd, Virginia Beach, Virginia; John Griffin, Alegen Health Research Center, Papillion, Nebraska; John Katopodis, Tallahassee Research Institute, Tallahassee, Florida; John Lopez, Loyola University Medical Center, Maywood, Illinois; John Wang, Union Memorial Hospital, MedStar Health, Baltimore, Maryland; Jorge Saucedo, University of Oklahoma Health Science Center, Oklahoma City, Oklahoma; Joshua Kieval, Palm Beach Heart Research Institute, JFK Medical Center, Atlantis, Florida; Kasi Ramanathan, Northwest Ohio Cardiology Consultants, Toledo Hospital, Toledo, Ohio; Kathleen Allen, Presbyterian Heart Group, Albuquerque, New Mexico; Keith Atassi, Northwest Indiana Cardiovascular Physicians P.C., Valparaiso, Indiana; Kevin Clayton, Munson Medical Center, Traverse City, Michigan; Kevin Croce, Brigham and Women's Hospital, Boston, Massachusetts; Kimberly Skelding, Geisinger Medical Center, Danville, Pennsylvania; Kiritkumar Patel, St. Joseph Mercy Oakland, Pontiac, Michigan; Kishore Harjai, Donald Guthrie Foundation, Sayre, Pennsylvania; Kollagunta Chandrasekhar, Winter Haven Hospital, Winter Haven, Florida; Kumar Kalapatapu, Westchester Medical Center, Hawthorne, New York; Larry Dean, University of Washington, Seattle, Washington; Lawrence Barr, Midwest Heart Foundation, Elmhurst Memorial Hospital, Oakbrook Terrace, Illinois; Lowell Satler, Washington Hospital Center, MedStar Health, Washington, District of Columbia; Luis Gruberg, Stony Brook University Medical Center, Stony Brook, New York; Manish Chauhan, Cardiovascular Specialists of Texas, North Austin Medical Center, Austin, Texas; Mark Dorogy, Medical Center of Central Georgia, Macon, Georgia; Mark Lurie, Torrance Memorial Medical

Center, Torrance, California; Maurice Buchbinder, Foundation for Cardiovascular Medicine, San Diego, California; Mayra Guerrero, Henry Ford Hospital, Detroit, Michigan; Michael Del Core, The Cardiac Center of Creighton University Medical Center, Omaha, Nebraska; Michael Kelberman, St. Elizabeth Medical Center, Utica, New York; Michael Lim, St. Louis University, St. Louis, Missouri; Michael Ragosta, University of Virginia, Charlottesville, Virginia; Michael Rinaldi, Carolinas Medical Center, Sanger Heart Vascular Research, Charlotte, North Carolina; Michael Tamberella, Carolina Heart Specialists, Mid Carolina Cardiology Gastonia, Gastonia, North Carolina; Miles McClure, Mid-Michigan Heart and Vascular Center, Saginaw, Michigan; Mirle Kellett, Maine Medical Center, Portland, Maine; Mladen Vidovich, University of Illinois Hospital, Chicago, Illinois; Mohamed Effat, University of Cincinnati, Cincinnati, Ohio; Mohd Ayoub Mirza, Carilion Medical Center, Roanoke, Virginia; Muhammad Khan, North Dallas Research Associates, McKinney, Texas; Nabil Dib, Mercy Gilbert Medical Center, Gilbert, Arizona; Nathan Laufer, Heart and Vascular Center of Arizona, Phoenix, Arizona; Neal Kleiman, The Methodist Hospital, Houston, Texas; Niam Farhat, North Ohio Heart Center, North Ohio Research Ltd, Lorain, Ohio; Osvaldo Gigliotti, Seton Heart Institute, Austin, Texas; Patricia Best, Mayo Clinic, Rochester, Minnesota; Paul Gordon, The Miriam Hospital, Providence, Rhode Island; Paul Gurbel, Sinai Center for Thrombosis Research, Baltimore, Maryland; Paul Luetmer, Aspirus Heart and Vascular Institute, Wausau, Wisconsin; Paul Tolerico, York Hospital, York, Pennsylvania; Peter Kerwin, Midwest Heart Foundation, Advocate Good Samaritan, Downers Grove, Illinois; Peter Ver Lee, Northeast Cardiology Associates, Eastern Maine Medical Center, Bangor, Maine; Phillip Kraft, Beaumont Hospital Troy, Troy, Michigan; Rafael Gonzalez, Scott & White Health Care Round Rock, Round Rock, Texas; Rajesh Dave, Spirit Physician Services, Capital Cardiovascular Associates, Camp Hill, Pennsylvania; Rakesh Prashad, Ocala Research Institute Inc., Ocala, Florida; Ramon Quesada, Baptist Hospital, Miami, Florida; Ramon Aycock, Cardiology Consultants, Baptist Hospital, Pensacola, Florida; Renzi Randolph, Winchester Medical Center, Winchester, Virginia; Richard Bach, Washington University School of Medicine in St. Louis, St. Louis, Missouri; Richard Kettelkamp, Cardiologists LC, Cedar Rapids, Iowa; Richard Paulus, King's Daughters Medical Center, Ashland, Kentucky; Richard Waters, St. Joseph's Medical Center, Stockton, California; Richard Zelman, Cape Cod Research Institute, Hyannis, Massachusetts; Robert Applegate, Wake Forest University, Winston-Salem, North Carolina; Robert Feldman, MediQuest Munroe Regional Medical Center, Ocala, Florida; Robert Smith, Tyler Cardiovascular Consultants, Tyler, Texas; Robert Watson, Abington Medical Specialist, Abington, Pennsylvania; Roger Gammon, Austin Heart Research, Austin, Texas; Ronald Caputo, St. Joseph Hospital Cardiology Associates, Liverpool, New York; Ronald Stella, Heart Care Research Foundation, Heart Care Centers of Illinois, Berwyn, Illinois; Samir Hadeed, Conemaugh Valley Memorial Hospital, Johnstown, Pennsylvania; Saurabh Gupta, Oregon Health and Science University, Portland, Oregon; Sergio Waxman, Lahey Clinic Medical Center, Burlington, Massachusetts; Simon Dixon, William Beaumont Hospital, Royal Oak, Michigan; Srihari Naidu, Winthrop University Hospital, Mineola, New York; Srinivasa Potluri, The Heart Hospital Baylor Plano, Plano, Texas; Stephen Cook, Novant Clinical Research Institute, Forsyth Medical Center, Winston-Salem, North Carolina; Stephen Crowley, Aurora Denver Cardiology Associates, Aurora, Colorado; Stephen Thew, Heart Clinics Northwest P.S., Spokane, Washington; Steve Marshalko, Bridgeport Hospital, Bridgeport, Connecticut; Steven Guidera, Doylestown Hospital, Doylestown, Pennsylvania; Steven Hearne, Delmarva Heart Research Foundation, Peninsula Regional Medical Center, Salisbury, Maryland; Steven Karas, MIMA Century Research

Associates, Health First, Melbourne, Florida; Steven Manoukian, Centennial Heart, Sarah Cannon Research Institute, Nashville, Tennessee; Steven Yakubov, Ohio Health Research Institute, Riverside Methodist Hospital, Columbus, Ohio; Stewart Pollock, Rockingham Memorial Hospital, Harrisonburg, Virginia; Subhash Banerjee, VA North Texas Health Care Center, Dallas VA Medical Center, Dallas, Texas; Suhail Allaqaband, Aurora St. Luke's, Sinai Medical Center, Milwaukee, Wisconsin; Sung Choi, California Pacific Medical Center Research, San Francisco, California; Suresh Mulukutla, University of Pittsburgh Medical Center, Pittsburgh, Pennsylvania; Tayo Addo, University of Texas Southwestern Medical Center, Dallas, Texas; Thomas Haldis, MeritCare Hospital Pharmacy, Sanford Medical Center, Fargo, North Dakota; Thomas McGarry, Oklahoma Foundation for Cardiovascular Research, Oklahoma City, Oklahoma; Thomas Nygaard, The Cardiovascular Group, Centra, Lynchburg, Virginia; Thomas K. Pow, Great Lakes Heart and Vascular Institute, St. Joseph, Michigan; Timothy Larkin, Midwest Heart Specialists, Edward Heart Hospital, Naperville, Illinois; Todd Caulfield, Providence St. Vincent Medical Center, Portland, Oregon; Tomasz Stys, Sanford Research, University of South Dakota, Sioux Falls, South Dakota; Vishal Gupta, Borgess Research Institute, Kalamazoo, Michigan; Walt Marquardt, Mercy General Hospital, Mercy Heart and Vascular Institute, Sacramento, California; William Ballard, Piedmont Heart Institute, Piedmont Medical Center, Atlanta, Georgia; William French, LA Biomed Research Institute, Harbor UCLA Medical Center, Torrance, California; Zafir Hawa, North Kansas City Hospital, North Kansas City, Missouri; Zubair Jafar, Hudson Valley Heart Center, Poughkeepsie, New York
